# Supplementary material for: An Event-Specific Real-Time PCR Method for Measuring Transgenic Lysozyme Goat Content in Trace Samples
Source: MDPI journal article supplement (doi:10.3390/foods10050925), 2021-04-23
Supplement: s1 [file s1]

**Supplementary Table S1. Information for practical samples**

| Sample type | Sample name | Animal type | Goat code number | Goat generation |
|-------------|-------------|-------------|------------------|-----------------|
| Blood       | B106        | GM          | 106              | F1              |
|             | B176        | GM          | 176              | F2              |
|             | B254        | GM          | 254              | F2              |
|             | B350        | GM          | 350              | F3              |
|             | B418        | GM          | 418              | F3              |
|             | B476        | GM          | 476              | F4              |
|             | B494        | GM          | 494              | F4              |
|             | B496        | GM          | 496              | F4              |
|             | B498        | GM          | 498              | F5              |
|             | B502        | GM          | 502              | F5              |
|             | B518        | GM          | 518              | F6              |
|             | B522        | GM          | 522              | F6              |
|             | B540        | GM          | 540              | F7              |
|             | B18006      | GM          | 18006            | F7              |
|             | B18014      | GM          | 18014            | F8              |
|             | B18046      | GM          | 18046            | F8              |
| Milk        | M418        | GM          | 418              | F3              |
|             | M494        | GM          | 494              | F4              |
|             | M502        | GM          | 502              | F5              |
|             | M522        | GM          | 522              | F6              |
|             | M-N1        | Non-GM      | AB-1             |                 |
| Faeces      | F106        | GM          | 106              | F1              |
|             | F176        | GM          | 176              | F2              |
|             | F254        | GM          | 254              | F2              |
|             | F350        | GM          | 350              | F3              |
|             | F418        | GM          | 418              | F3              |
|             | F494        | GM          | 494              | F4              |

|      |        |        |       |    |
|------|--------|--------|-------|----|
|      | F476   | GM     | 476   | F4 |
|      | F496   | GM     | 496   | F4 |
|      | F498   | GM     | 498   | F5 |
|      | F502   | GM     | 502   | F5 |
|      | F518   | GM     | 518   | F6 |
|      | F522   | GM     | 522   | F6 |
|      | F540   | GM     | 540   | F7 |
|      | F18006 | GM     | 18006 | F7 |
|      | F18014 | GM     | 18014 | F8 |
|      | F18046 | GM     | 18046 | F8 |
|      | F-N1   | Non-GM | AB-1  | /  |
|      | F-N2   | Non-GM | AB-2  | /  |
| Soil | S1     | GM     | /     | /  |
|      | S2     | GM     | /     | /  |
|      | S3     | GM     | /     | /  |
|      | S4     | GM     | /     | /  |
|      | S5     | GM     | /     | /  |
